# Supplementary material for: De novo transcriptome sequencing of two cultivated jute species under salinity stress
Source: PLoS One. 2017 Oct 23;12(10):e0185863. doi: 10.1371/journal.pone.0185863 (PMC5653190; doi:10.1371/journal.pone.0185863)
Supplement: S5 File — (XLS) [file pone.0185863.s005.xls]

## Sheet: Supplementary file S5.
Genes	Gene Length	NR Description
c125648_g1	992	--
c125648_g2	1177	Early nodulin-like protein 2, putative [Theobroma cacao]>gi|508721141|gb|EOY13038.1| Early nodulin-like protein 2, putative [Theobroma cacao]
c121603_g1	1951	Uncharacterized protein TCM_034727 [Theobroma cacao]>gi|508723861|gb|EOY15758.1| Uncharacterized protein TCM_034727 [Theobroma cacao]
c133505_g2	1297	Polyketide cyclase/dehydrase and lipid transport superfamily protein [Theobroma cacao]>gi|508715194|gb|EOY07091.1| Polyketide cyclase/dehydrase and lipid transport superfamily protein [Theobroma cacao]
c127465_g1	2132	Sulfate/thiosulfate import ATP-binding protein cysA, putative [Theobroma cacao]>gi|508701900|gb|EOX93796.1| Sulfate/thiosulfate import ATP-binding protein cysA, putative [Theobroma cacao]
c127438_g1	2229	Ethylene-dependent gravitropism-deficient and yellow-green-like 3 [Theobroma cacao]>gi|508706621|gb|EOX98517.1| Ethylene-dependent gravitropism-deficient and yellow-green-like 3 [Theobroma cacao]
c119691_g1	1798	--
c128683_g1	2851	Circadian clock coupling factor ZGT [Theobroma cacao]>gi|508702936|gb|EOX94832.1| Circadian clock coupling factor ZGT [Theobroma cacao]
c124720_g1	1253	Pleiotropic drug resistance 11 [Theobroma cacao]>gi|508778975|gb|EOY26231.1| Pleiotropic drug resistance 11 [Theobroma cacao]
c134208_g1	2377	Nuclear factor Y, putative [Theobroma cacao]>gi|508717415|gb|EOY09312.1| Nuclear factor Y, putative [Theobroma cacao]
c127303_g1	2595	Nicotianamine synthase 3 [Theobroma cacao]>gi|508719757|gb|EOY11654.1| Nicotianamine synthase 3 [Theobroma cacao]
c120794_g1	1205	Uncharacterized protein TCM_004752 [Theobroma cacao]>gi|508703305|gb|EOX95201.1| Uncharacterized protein TCM_004752 [Theobroma cacao]
c131555_g1	2409	U-box domain-containing protein 19, putative [Theobroma cacao]>gi|508773423|gb|EOY20679.1| U-box domain-containing protein 19, putative [Theobroma cacao]
c125592_g1	1341	Uncharacterized protein TCM_020689 [Theobroma cacao]>gi|508713878|gb|EOY05775.1| Uncharacterized protein TCM_020689 [Theobroma cacao]
c121255_g1	906	--
c133400_g2	2416	Phosphoglycerate mutase family protein [Theobroma cacao]>gi|508777565|gb|EOY24821.1| Phosphoglycerate mutase family protein [Theobroma cacao]
c136141_g1	2915	Subtilisin-like serine endopeptidase family protein [Theobroma cacao]>gi|508699547|gb|EOX91443.1| Subtilisin-like serine endopeptidase family protein [Theobroma cacao]
c119017_g1	1246	Uncharacterized protein TCM_041077 [Theobroma cacao]>gi|508785825|gb|EOY33081.1| Uncharacterized protein TCM_041077 [Theobroma cacao]
c133330_g2	2698	hypothetical protein VITISV_032527 [Vitis vinifera]
c127415_g1	4212	CAP160 protein, putative [Theobroma cacao]>gi|508775933|gb|EOY23189.1| CAP160 protein, putative [Theobroma cacao]
c130565_g1	2268	Phosphatase 2C 49 [Theobroma cacao]>gi|508703490|gb|EOX95386.1| Phosphatase 2C 49 [Theobroma cacao]
c128896_g7	454	18 kDa seed maturation protein [Morus notabilis]
c125673_g1	2803	Highly ABA-induced PP2C gene 3, putative [Theobroma cacao]>gi|508776241|gb|EOY23497.1| Highly ABA-induced PP2C gene 3, putative [Theobroma cacao]
c133591_g2	3689	ABI five binding protein 3, putative [Theobroma cacao]>gi|508711788|gb|EOY03685.1| ABI five binding protein 3, putative [Theobroma cacao]
c131903_g1	2520	PREDICTED: basic 7S globulin [Vitis vinifera]
c126765_g3	1468	Uncharacterized protein TCM_017093 [Theobroma cacao]>gi|508710800|gb|EOY02697.1| Uncharacterized protein TCM_017093 [Theobroma cacao]
c126658_g1	2728	CFIM-25 isoform 1 [Theobroma cacao]>gi|508783097|gb|EOY30353.1| CFIM-25 isoform 1 [Theobroma cacao]
c118610_g1	855	Tetratricopeptide repeat-like superfamily protein, putative [Theobroma cacao]>gi|508776705|gb|EOY23961.1| Tetratricopeptide repeat-like superfamily protein, putative [Theobroma cacao]
c123359_g1	1320	NAD(P)-linked oxidoreductase superfamily protein [Theobroma cacao]>gi|508776416|gb|EOY23672.1| NAD(P)-linked oxidoreductase superfamily protein [Theobroma cacao]
c126004_g1	2102	Heat shock transcription factor B2A, putative [Theobroma cacao]>gi|508775877|gb|EOY23133.1| Heat shock transcription factor B2A, putative [Theobroma cacao]
c131945_g2	3444	Phosphatase 2C family protein isoform 2, partial [Theobroma cacao]>gi|508783411|gb|EOY30667.1| Phosphatase 2C family protein isoform 2, partial [Theobroma cacao]
c126965_g1	2558	Nine-cis-epoxycarotenoid dioxygenase 3 [Theobroma cacao]>gi|508721808|gb|EOY13705.1| Nine-cis-epoxycarotenoid dioxygenase 3 [Theobroma cacao]
c125807_g1	1409	Heat shock transcription factor C1, putative [Theobroma cacao]>gi|508783548|gb|EOY30804.1| Heat shock transcription factor C1, putative [Theobroma cacao]
c133945_g1	3758	Transmembrane amino acid transporter family protein, putative isoform 3 [Theobroma cacao]>gi|508717053|gb|EOY08950.1| Transmembrane amino acid transporter family protein, putative isoform 3 [Theobroma cacao]
c132483_g2	2587	Phosphatase 2C 16 isoform 4 [Theobroma cacao]>gi|508779920|gb|EOY27176.1| Phosphatase 2C 16 isoform 4 [Theobroma cacao]
c136119_g1	4574	Pyrroline-5-carboxylate synthetase isoform 1 [Theobroma cacao]>gi|508715516|gb|EOY07413.1| Pyrroline-5-carboxylate synthetase isoform 1 [Theobroma cacao]
c125333_g2	1322	Uncharacterized protein isoform 1 [Theobroma cacao]>gi|508700582|gb|EOX92478.1| Uncharacterized protein isoform 1 [Theobroma cacao]
c123399_g2	2643	BTB and TAZ domain protein 2 isoform 1 [Theobroma cacao]>gi|508775063|gb|EOY22319.1| BTB and TAZ domain protein 2 isoform 1 [Theobroma cacao]
c119257_g1	686	--
c131116_g1	1970	Uncharacterized protein isoform 1 [Theobroma cacao]>gi|508702817|gb|EOX94713.1| Uncharacterized protein isoform 1 [Theobroma cacao]
c117692_g1	692	--
c133052_g1	2684	--
c128882_g1	2671	DC1 domain-containing protein isoform 2 [Theobroma cacao]>gi|508723219|gb|EOY15116.1| DC1 domain-containing protein isoform 2 [Theobroma cacao]
c119845_g1	1074	Uncharacterized protein isoform 1 [Theobroma cacao]>gi|508711532|gb|EOY03429.1| Uncharacterized protein isoform 1 [Theobroma cacao]
c131584_g1	2878	Cyclic nucleotide-gated channel 15 [Theobroma cacao]>gi|508787143|gb|EOY34399.1| Cyclic nucleotide-gated channel 15 [Theobroma cacao]
c128025_g1	2106	TSPO(outer membrane tryptophan-rich sensory protein)-related [Theobroma cacao]>gi|508703133|gb|EOX95029.1| TSPO(outer membrane tryptophan-rich sensory protein)-related [Theobroma cacao]
c125363_g1	1949	Galactinol synthase 2 [Theobroma cacao]>gi|508719815|gb|EOY11712.1| Galactinol synthase 2 [Theobroma cacao]
c135538_g1	4850	Uncharacterized protein isoform 2 [Theobroma cacao]>gi|590711135|ref|XP_007049021.1| Uncharacterized protein isoform 2 [Theobroma cacao]>gi|590711138|ref|XP_007049022.1| Uncharacterized protein isoform 2 [Theobroma cacao]>gi|590711141|ref|XP_007049023.1| Uncharacterized protein isoform 2 [Theobroma cacao]>gi|590711144|ref|XP_007049024.1| Uncharacterized protein isoform 2 [Theobroma cacao]>gi|5087…
c136754_g3	2386	Uncharacterized protein TCM_004966 [Theobroma cacao]>gi|508703587|gb|EOX95483.1| Uncharacterized protein TCM_004966 [Theobroma cacao]
c128960_g1	2366	conserved hypothetical protein [Ricinus communis]>gi|223532061|gb|EEF33870.1| conserved hypothetical protein [Ricinus communis]
c125996_g1	1747	Cysteine-rich RLK 42 [Theobroma cacao]>gi|508710569|gb|EOY02466.1| Cysteine-rich RLK 42 [Theobroma cacao]
c130695_g1	2570	Major facilitator superfamily protein isoform 2 [Theobroma cacao]>gi|590577037|ref|XP_007013123.1| Major facilitator superfamily protein isoform 2 [Theobroma cacao]>gi|590577040|ref|XP_007013124.1| Major facilitator superfamily protein isoform 2 [Theobroma cacao]>gi|508783485|gb|EOY30741.1| Major facilitator superfamily protein isoform 2 [Theobroma cacao]>gi|508783486|gb|EOY30742.1| Major facilit…
c122070_g1	2478	Abscisic acid responsive element-binding factor 1, putative isoform 1 [Theobroma cacao]>gi|590686645|ref|XP_007042440.1| Abscisic acid responsive element-binding factor 1, putative isoform 1 [Theobroma cacao]>gi|508706374|gb|EOX98270.1| Abscisic acid responsive element-binding factor 1, putative isoform 1 [Theobroma cacao]>gi|508706375|gb|EOX98271.1| Abscisic acid responsive element-binding facto…
c122990_g2	1877	CBL-interacting protein kinase 25 [Theobroma cacao]>gi|508782091|gb|EOY29347.1| CBL-interacting protein kinase 25 [Theobroma cacao]
c129591_g2	1452	HVA22 E isoform 1 [Theobroma cacao]>gi|508775278|gb|EOY22534.1| HVA22 E isoform 1 [Theobroma cacao]
c134265_g2	1612	Peroxidase superfamily protein [Theobroma cacao]>gi|508709536|gb|EOY01433.1| Peroxidase superfamily protein [Theobroma cacao]
c123476_g1	2439	Winged-helix DNA-binding transcription factor family protein, putative isoform 1 [Theobroma cacao]>gi|508777396|gb|EOY24652.1| Winged-helix DNA-binding transcription factor family protein, putative isoform 1 [Theobroma cacao]
c130457_g1	3092	Sugar transporter protein 7 isoform 1 [Theobroma cacao]>gi|590579167|ref|XP_007013712.1| Sugar transporter protein 7 isoform 1 [Theobroma cacao]>gi|590579170|ref|XP_007013713.1| Sugar transporter protein 7 isoform 1 [Theobroma cacao]>gi|508784074|gb|EOY31330.1| Sugar transporter protein 7 isoform 1 [Theobroma cacao]>gi|508784075|gb|EOY31331.1| Sugar transporter protein 7 isoform 1 [Theobroma caca…
c119896_g1	758	Heavy metal transport/detoxification superfamily protein [Theobroma cacao]>gi|508724197|gb|EOY16094.1| Heavy metal transport/detoxification superfamily protein [Theobroma cacao]
c129974_g1	4023	Homeobox 7, putative [Theobroma cacao]>gi|508776633|gb|EOY23889.1| Homeobox 7, putative [Theobroma cacao]
c133776_g3	1156	HXXXD-type acyl-transferase family protein [Theobroma cacao]>gi|508725827|gb|EOY17724.1| HXXXD-type acyl-transferase family protein [Theobroma cacao]
c128404_g1	2236	Amino acid permease isoform 2 [Theobroma cacao]>gi|508719972|gb|EOY11869.1| Amino acid permease isoform 2 [Theobroma cacao]
c120335_g1	1950	Nodulin MtN3 family protein isoform 2, partial [Theobroma cacao]>gi|508719642|gb|EOY11539.1| Nodulin MtN3 family protein isoform 2, partial [Theobroma cacao]
c123057_g1	2130	Atypical CYS HIS rich thioredoxin 4 [Theobroma cacao]>gi|508718820|gb|EOY10717.1| Atypical CYS HIS rich thioredoxin 4 [Theobroma cacao]
c135443_g2	2963	Concanavalin A-like lectin protein kinase family protein, putative [Theobroma cacao]>gi|508706731|gb|EOX98627.1| Concanavalin A-like lectin protein kinase family protein, putative [Theobroma cacao]
c133830_g3	1655	Bifunctional inhibitor/lipid-transfer protein/seed storage 2S albumin superfamily protein [Theobroma cacao]>gi|508709334|gb|EOY01231.1| Bifunctional inhibitor/lipid-transfer protein/seed storage 2S albumin superfamily protein [Theobroma cacao]
c135185_g3	1028	PREDICTED: aquaporin PIP1-2 isoform X2 [Pyrus x bretschneideri]
c118045_g1	802	plasma membrane aquaporin [Vitis vinifera]
c123299_g1	2054	Phosphatase 2C family protein, putative [Theobroma cacao]>gi|508775759|gb|EOY23015.1| Phosphatase 2C family protein, putative [Theobroma cacao]
c129953_g1	2376	GDSL-like Lipase/Acylhydrolase superfamily protein, putative [Theobroma cacao]>gi|508720494|gb|EOY12391.1| GDSL-like Lipase/Acylhydrolase superfamily protein, putative [Theobroma cacao]
c129785_g5	2441	B-zip transcription factor, putative isoform 2 [Theobroma cacao]>gi|508707867|gb|EOX99763.1| B-zip transcription factor, putative isoform 2 [Theobroma cacao]
c130867_g2	1273	Branched-chain-amino-acid aminotransferase [Theobroma cacao]>gi|508723735|gb|EOY15632.1| Branched-chain-amino-acid aminotransferase [Theobroma cacao]
c132207_g2	1492	Uncharacterized protein TCM_000398 [Theobroma cacao]>gi|508699214|gb|EOX91110.1| Uncharacterized protein TCM_000398 [Theobroma cacao]
c123029_g1	877	Uncharacterized protein TCM_022156 [Theobroma cacao]>gi|508715935|gb|EOY07832.1| Uncharacterized protein TCM_022156 [Theobroma cacao]
c133662_g1	4883	AMP-dependent synthetase and ligase family protein isoform 1 [Theobroma cacao]>gi|508777443|gb|EOY24699.1| AMP-dependent synthetase and ligase family protein isoform 1 [Theobroma cacao]
c131632_g1	3787	Abscisic acid responsive elements-binding factor 2 isoform 1 [Theobroma cacao]>gi|590592201|ref|XP_007017214.1| Abscisic acid responsive elements-binding factor 2 isoform 1 [Theobroma cacao]>gi|508722541|gb|EOY14438.1| Abscisic acid responsive elements-binding factor 2 isoform 1 [Theobroma cacao]>gi|508722542|gb|EOY14439.1| Abscisic acid responsive elements-binding factor 2 isoform 1 [Theobroma c…
c129514_g7	986	Polyketide cyclase/dehydrase and lipid transport superfamily protein [Theobroma cacao]>gi|508725767|gb|EOY17664.1| Polyketide cyclase/dehydrase and lipid transport superfamily protein [Theobroma cacao]
c131792_g1	3519	Alpha/beta-Hydrolases superfamily protein isoform 1 [Theobroma cacao]>gi|590718049|ref|XP_007050734.1| Alpha/beta-Hydrolases superfamily protein isoform 1 [Theobroma cacao]>gi|508702994|gb|EOX94890.1| Alpha/beta-Hydrolases superfamily protein isoform 1 [Theobroma cacao]>gi|508702995|gb|EOX94891.1| Alpha/beta-Hydrolases superfamily protein isoform 1 [Theobroma cacao]
c130867_g1	762	Branched-chain-amino-acid aminotransferase [Theobroma cacao]>gi|508723735|gb|EOY15632.1| Branched-chain-amino-acid aminotransferase [Theobroma cacao]
c127758_g1	2793	PREDICTED: serine/threonine-protein kinase SAPK3-like [Cucumis melo]
c129805_g1	2970	FRIGIDA-like protein, putative [Theobroma cacao]>gi|508699695|gb|EOX91591.1| FRIGIDA-like protein, putative [Theobroma cacao]
c128860_g1	2778	Uncharacterized protein TCM_037753 [Theobroma cacao]>gi|508783346|gb|EOY30602.1| Uncharacterized protein TCM_037753 [Theobroma cacao]
c129675_g4	2179	Chaperone DnaJ-domain containing protein isoform 3 [Theobroma cacao]>gi|508780093|gb|EOY27349.1| Chaperone DnaJ-domain containing protein isoform 3 [Theobroma cacao]
c129865_g1	3529	Hydroxyproline-rich glycoprotein family protein, putative isoform 2 [Theobroma cacao]>gi|590641427|ref|XP_007030227.1| Hydroxyproline-rich glycoprotein family protein, putative isoform 2 [Theobroma cacao]>gi|590641431|ref|XP_007030228.1| Hydroxyproline-rich glycoprotein family protein, putative isoform 2 [Theobroma cacao]>gi|508718831|gb|EOY10728.1| Hydroxyproline-rich glycoprotein family protein…
c128946_g1	3793	NAD(P)-linked oxidoreductase superfamily protein, putative isoform 2 [Theobroma cacao]>gi|508715525|gb|EOY07422.1| NAD(P)-linked oxidoreductase superfamily protein, putative isoform 2 [Theobroma cacao]
c132132_g1	2737	Highly ABA-induced PP2C gene 2 isoform 1 [Theobroma cacao]>gi|508786674|gb|EOY33930.1| Highly ABA-induced PP2C gene 2 isoform 1 [Theobroma cacao]
c128984_g2	975	--
c131703_g1	3432	hypothetical protein PRUPE_ppa020120mg [Prunus persica]>gi|462423643|gb|EMJ27906.1| hypothetical protein PRUPE_ppa020120mg [Prunus persica]
c133591_g1	4435	ABI five binding protein 2, putative isoform 1 [Theobroma cacao]>gi|508709784|gb|EOY01681.1| ABI five binding protein 2, putative isoform 1 [Theobroma cacao]
c120047_g1	815	MYB-like 102 [Theobroma cacao]>gi|508781188|gb|EOY28444.1| MYB-like 102 [Theobroma cacao]
c136860_g1	2860	DC1 domain-containing protein isoform 3 [Theobroma cacao]>gi|508723220|gb|EOY15117.1| DC1 domain-containing protein isoform 3 [Theobroma cacao]
c129247_g1	1971	Abscisic acid responsive element-binding factor 1, putative isoform 1 [Theobroma cacao]>gi|590686645|ref|XP_007042440.1| Abscisic acid responsive element-binding factor 1, putative isoform 1 [Theobroma cacao]>gi|508706374|gb|EOX98270.1| Abscisic acid responsive element-binding factor 1, putative isoform 1 [Theobroma cacao]>gi|508706375|gb|EOX98271.1| Abscisic acid responsive element-binding facto…
c133905_g2	5049	Uncharacterized protein TCM_017094 [Theobroma cacao]>gi|508710801|gb|EOY02698.1| Uncharacterized protein TCM_017094 [Theobroma cacao]
c128914_g1	4076	Uncharacterized protein isoform 4, partial [Theobroma cacao]>gi|508700924|gb|EOX92820.1| Uncharacterized protein isoform 4, partial [Theobroma cacao]
c119818_g1	1821	dehydrin protein [Manihot esculenta]
c124247_g1	2393	Uncharacterized protein isoform 1 [Theobroma cacao]>gi|590680538|ref|XP_007040889.1| Uncharacterized protein isoform 1 [Theobroma cacao]>gi|508778133|gb|EOY25389.1| Uncharacterized protein isoform 1 [Theobroma cacao]>gi|508778134|gb|EOY25390.1| Uncharacterized protein isoform 1 [Theobroma cacao]
c125980_g1	2515	Non-yellowing 1 isoform 1 [Theobroma cacao]>gi|508777325|gb|EOY24581.1| Non-yellowing 1 isoform 1 [Theobroma cacao]
c132910_g1	2785	Raffinose synthase family protein [Theobroma cacao]>gi|508710583|gb|EOY02480.1| Raffinose synthase family protein [Theobroma cacao]
c129039_g2	1761	Uncharacterized protein TCM_029854 [Theobroma cacao]>gi|508780969|gb|EOY28225.1| Uncharacterized protein TCM_029854 [Theobroma cacao]
c134566_g1	2093	Lysine decarboxylase family protein [Theobroma cacao]>gi|508723102|gb|EOY14999.1| Lysine decarboxylase family protein [Theobroma cacao]
c135981_g1	3699	NAD(P)-linked oxidoreductase superfamily protein, putative isoform 2 [Theobroma cacao]>gi|508715525|gb|EOY07422.1| NAD(P)-linked oxidoreductase superfamily protein, putative isoform 2 [Theobroma cacao]
c131663_g1	2688	Uncharacterized protein isoform 1 [Theobroma cacao]>gi|508701691|gb|EOX93587.1| Uncharacterized protein isoform 1 [Theobroma cacao]
c131832_g3	1222	Uncharacterized protein TCM_014589 [Theobroma cacao]>gi|508775161|gb|EOY22417.1| Uncharacterized protein TCM_014589 [Theobroma cacao]
c135509_g6	1840	Heat shock transcription factor A2, putative [Theobroma cacao]>gi|508783155|gb|EOY30411.1| Heat shock transcription factor A2, putative [Theobroma cacao]
c131841_g2	660	Nuclear transcription factor Y subunit C-2 isoform 1 [Theobroma cacao]>gi|590613295|ref|XP_007022623.1| Nuclear transcription factor Y subunit C-2 isoform 1 [Theobroma cacao]>gi|590613298|ref|XP_007022624.1| Nuclear transcription factor Y subunit C-2 isoform 1 [Theobroma cacao]>gi|590613302|ref|XP_007022625.1| Nuclear transcription factor Y subunit C-2 isoform 1 [Theobroma cacao]>gi|590613306|ref…
c134914_g1	1400	NAC domain protein, IPR003441 [Theobroma cacao]>gi|508724460|gb|EOY16357.1| NAC domain protein, IPR003441 [Theobroma cacao]
c134208_g2	1594	Nuclear factor Y, putative [Theobroma cacao]>gi|508717415|gb|EOY09312.1| Nuclear factor Y, putative [Theobroma cacao]
c132621_g1	3675	Aldehyde dehydrogenase 12A1 isoform 1 [Theobroma cacao]>gi|590667534|ref|XP_007037248.1| Aldehyde dehydrogenase 12A1 isoform 1 [Theobroma cacao]>gi|508774492|gb|EOY21748.1| Aldehyde dehydrogenase 12A1 isoform 1 [Theobroma cacao]>gi|508774493|gb|EOY21749.1| Aldehyde dehydrogenase 12A1 isoform 1 [Theobroma cacao]
c130932_g1	3464	G-box binding factor 3, putative isoform 1 [Theobroma cacao]>gi|508703900|gb|EOX95796.1| G-box binding factor 3, putative isoform 1 [Theobroma cacao]
c125847_g1	1837	Sulfate transporter, putative [Theobroma cacao]>gi|508784088|gb|EOY31344.1| Sulfate transporter, putative [Theobroma cacao]
c122990_g1	812	CBL-interacting protein kinase 25 [Theobroma cacao]>gi|508782091|gb|EOY29347.1| CBL-interacting protein kinase 25 [Theobroma cacao]
c125400_g1	2924	Beta-amylase 1 isoform 1 [Theobroma cacao]>gi|508714369|gb|EOY06266.1| Beta-amylase 1 isoform 1 [Theobroma cacao]
c135494_g1	2026	Tetratricopeptide repeat-like superfamily protein, putative [Theobroma cacao]>gi|508778548|gb|EOY25804.1| Tetratricopeptide repeat-like superfamily protein, putative [Theobroma cacao]
c132989_g1	4210	Uncharacterized protein TCM_029497 [Theobroma cacao]>gi|508780460|gb|EOY27716.1| Uncharacterized protein TCM_029497 [Theobroma cacao]
c117937_g1	1123	Bifunctional inhibitor/lipid-transfer protein/seed storage 2S albumin superfamily protein [Theobroma cacao]>gi|508704389|gb|EOX96285.1| Bifunctional inhibitor/lipid-transfer protein/seed storage 2S albumin superfamily protein [Theobroma cacao]
c83404_g1	1375	--
c134327_g1	4603	Seed imbibition 2 isoform 1 [Theobroma cacao]>gi|508717396|gb|EOY09293.1| Seed imbibition 2 isoform 1 [Theobroma cacao]
c119880_g1	1011	hypothetical protein CICLE_v10006176mg [Citrus clementina]>gi|568871760|ref|XP_006489048.1| PREDICTED: uncharacterized protein LOC102608273 [Citrus sinensis]>gi|557521402|gb|ESR32769.1| hypothetical protein CICLE_v10006176mg [Citrus clementina]>gi|641852873|gb|KDO71732.1| hypothetical protein CISIN_1g032471mg [Citrus sinensis]
c129098_g1	3919	unknown [Zea mays]>gi|414866815|tpg|DAA45372.1| TPA: hypothetical protein ZEAMMB73_163222 [Zea mays]
c124628_g5	1279	Homeobox 7 [Theobroma cacao]>gi|508703726|gb|EOX95622.1| Homeobox 7 [Theobroma cacao]
c128405_g2	2069	PREDICTED: heat shock cognate 70 kDa protein 2-like [Phoenix dactylifera]
c126561_g1	1940	Eukaryotic aspartyl protease family protein [Theobroma cacao]>gi|508711147|gb|EOY03044.1| Eukaryotic aspartyl protease family protein [Theobroma cacao]
c131039_g1	2706	Uncharacterized protein TCM_005286 [Theobroma cacao]>gi|508704000|gb|EOX95896.1| Uncharacterized protein TCM_005286 [Theobroma cacao]
c122229_g1	1321	Heat shock protein 70B [Theobroma cacao]>gi|508778858|gb|EOY26114.1| Heat shock protein 70B [Theobroma cacao]
c126674_g1	1623	Flower, cultured cell, putative [Theobroma cacao]>gi|508704329|gb|EOX96225.1| Flower, cultured cell, putative [Theobroma cacao]
c116668_g1	757	Late embryogenesis abundant protein group 8 protein, putative [Theobroma cacao]>gi|508699718|gb|EOX91614.1| Late embryogenesis abundant protein group 8 protein, putative [Theobroma cacao]
c125327_g1	2116	Cell wall / vacuolar inhibitor of fructosidase 1, putative [Theobroma cacao]>gi|508714888|gb|EOY06785.1| Cell wall / vacuolar inhibitor of fructosidase 1, putative [Theobroma cacao]
