# Supplementary material for: De novo transcriptome sequencing of two cultivated jute species under salinity stress
Source: PLoS One. 2017 Oct 23;12(10):e0185863. doi: 10.1371/journal.pone.0185863 (PMC5653190; doi:10.1371/journal.pone.0185863)
Supplement: S6 File — (XLSX) [file pone.0185863.s006.xlsx]

## Sheet: Sheet1
TFs	TFs families
c25717_g1	SNF2
c126912_g1	Trihelix
c126356_g1	PHD
c132529_g1	SET
c106675_g1	CCAAT
c135838_g1	FAR1
c127904_g3	TAZ
c109895_g1	NAC
c133609_g1	NAC
c136059_g1	SWI/SNF-BAF60b
c126473_g1	MYB
c119748_g1	C2H2
c2207_g1	MYB
c128058_g1	bHLH
c134245_g4	CAMTA
c87817_g1	LIM
c129798_g1	PHD
c134094_g2	bHLH
c135884_g2	WRKY
c134069_g4	bHLH
c104895_g1	C3H
c122847_g1	SET
c10040_g1	C2H2
c247008_g1	FHA
c118923_g2	Orphans
c76177_g1	C2H2
c126322_g1	C2C2-CO-like
c112221_g2	E2F-DP
c327370_g1	TUB
c123388_g2	MYB
c124661_g2	PLATZ
c135352_g1	C2C2-GATA
c132354_g1	Orphans
c115474_g1	C2C2-GATA
c132256_g2	FAR1
c126453_g4	HMG
c45486_g1	C3H
c129571_g1	FAR1
c325061_g1	CCAAT
c95702_g1	TUB
c117397_g2	LOB
c126809_g2	ARF
c119329_g2	ABI3VP1
c136590_g2	DDT
c127222_g4	mTERF
c128299_g1	MYB
c128740_g1	NAC
c28566_g1	CSD
c136596_g5	Jumonji
c94850_g1	SNF2
c113141_g1	ABI3VP1
c134635_g1	GeBP
c117862_g1	GNAT
c95143_g1	TRAF
c122392_g1	Rcd1-like
c61541_g1	CCAAT
c136180_g2	PHD
c245359_g1	MYB
c128282_g4	WRKY
c136787_g1	SNF2
c135835_g1	Orphans
c125238_g4	GNAT
c278706_g1	CCAAT
c133409_g4	MYB
c121546_g1	OFP
c108537_g1	bZIP
c131461_g1	ARR-B
c122849_g1	AP2-EREBP
c121884_g7	CCAAT
c116355_g1	bHLH
c133755_g1	zf-HD
c41500_g1	TRAF
c76963_g1	AP2-EREBP
c112138_g1	C3H
c115924_g1	MADS
c129780_g3	C2C2-Dof
c129549_g1	TUB
c317405_g1	TCP
c104244_g1	C3H
c132391_g1	MYB
c129715_g2	MED6
c120188_g1	C2H2
c91929_g1	MYB
c87516_g1	MYB
c122642_g1	MYB
c123468_g1	PLATZ
c135268_g2	SNF2
c48980_g1	GNAT
c133878_g2	AP2-EREBP
c118989_g1	CSD
c124470_g1	SBP
c125076_g2	LIM
c268035_g1	SBP
c127088_g1	C2H2
c130907_g1	bHLH
c133974_g1	bHLH
c136343_g2	MYB
c15171_g1	AP2-EREBP
c135625_g2	SRS
c280135_g1	C2H2
c102983_g2	CCAAT
c118914_g1	AP2-EREBP
c117053_g1	PLATZ
c16204_g1	bZIP
c122876_g1	C2C2-Dof
c82499_g1	GRAS
c127622_g1	AP2-EREBP
c134094_g1	bHLH
c127653_g1	MYB
c134203_g1	Orphans
c226468_g1	CPP
c135038_g4	E2F-DP
c136346_g1	Trihelix
c124681_g1	E2F-DP
c123791_g5	AP2-EREBP
c125954_g1	C2H2
c129089_g1	Orphans
c122612_g1	Orphans
c125938_g1	AP2-EREBP
c120645_g1	GRAS
c128923_g1	NAC
c106486_g1	AP2-EREBP
c133563_g1	SNF2
c20763_g1	MYB
c121377_g1	AP2-EREBP
c84497_g1	C3H
c136482_g1	AP2-EREBP
c135466_g1	bZIP
c117166_g1	C3H
c130644_g3	MYB
c124658_g1	bZIP
c128308_g6	NAC
c133271_g4	PHD
c121884_g6	CCAAT
c127764_g2	LOB
c327189_g1	Orphans
c132183_g2	G2-like
c129532_g1	NAC
c79763_g1	C3H
c146467_g1	C3H
c134079_g2	C3H
c123760_g1	HB
c134533_g3	TRAF
c262210_g1	GNAT
c45558_g1	EIL
c121736_g6	CCAAT
c133913_g1	GRAS
c116179_g1	LOB
c24114_g1	HSF
c136685_g1	SET
c132356_g2	bHLH
c130421_g1	Alfin-like
c105407_g1	GRAS
c124627_g2	NAC
c91988_g1	Jumonji
c128318_g1	FAR1
c128558_g1	FAR1
c57147_g1	MYB
c127591_g1	Tify
c114695_g1	C3H
c122407_g1	AP2-EREBP
c127664_g1	C2C2-CO-like
c127359_g1	bHLH
c129425_g1	bZIP
c110074_g1	LIM
c130882_g1	Tify
c132183_g5	MYB
c128191_g2	CCAAT
c139389_g1	IWS1
c110862_g1	GRAS
c332432_g1	CSD
c133559_g1	C3H
c135315_g4	AP2-EREBP
c135840_g2	GRAS
c131971_g1	SET
c127082_g1	MYB
c133778_g3	OFP
c128375_g2	Trihelix
c124331_g2	AUX/IAA
c129209_g3	NAC
c85940_g1	CCAAT
c136181_g1	bHLH
c122353_g2	GRAS
c125271_g3	LOB
c136908_g4	mTERF
c135223_g1	PHD
c125541_g1	TRAF
c129266_g4	bHLH
c133722_g1	HB
c136033_g1	MYB
c250930_g1	C3H
c162437_g1	Orphans
c135139_g2	Orphans
c108299_g1	C2H2
c98552_g1	IWS1
c113848_g1	HMG
c6819_g1	Orphans
c122886_g1	TRAF
c11639_g1	Orphans
c119155_g1	bZIP
c116803_g1	MADS
c135446_g1	PHD
c122984_g1	WRKY
c110565_g2	AUX/IAA
c125453_g5	AP2-EREBP
c121150_g1	bHLH
c336995_g1	HSF
c127314_g2	bZIP
c129525_g1	ABI3VP1
c103134_g1	ABI3VP1
c102532_g1	PHD
c145271_g1	C3H
c135959_g1	RWP-RK
c129780_g2	C2C2-Dof
c123003_g2	MYB
c126170_g2	MYB
c64451_g1	HMG
c121950_g1	MYB
c136333_g1	G2-like
c117647_g1	S1Fa-like
c128933_g2	GNAT
c135925_g1	bZIP
c94814_g1	bHLH
c111502_g1	SAP
c131651_g1	C2H2
c127853_g5	C2H2
c80696_g1	Orphans
c122160_g1	Trihelix
c111265_g1	C3H
c7239_g1	CCAAT
c128774_g1	SWI/SNF-SWI3
c99035_g1	HMG
c127894_g1	SNF2
c108699_g1	Alfin-like
c81647_g1	mTERF
c109761_g1	NAC
c211859_g1	bHLH
c121712_g1	TRAF
c127032_g1	TRAF
c218073_g1	MYB
c333995_g1	Orphans
c122230_g1	HB
c136325_g4	AP2-EREBP
c115766_g1	C3H
c134034_g1	CPP
c126941_g4	MYB
c67863_g1	FHA
c130438_g2	NAC
c253968_g1	MYB
c128096_g1	GNAT
c111745_g2	MYB
c109843_g1	FAR1
c120737_g1	HB
c122632_g3	PLATZ
c136076_g1	AUX/IAA
c128933_g1	MYB
c133956_g3	WRKY
c120385_g1	AP2-EREBP
c129660_g1	AP2-EREBP
c128577_g4	NAC
c119372_g1	C2C2-GATA
c106279_g2	C2H2
c134424_g2	TRAF
c127982_g1	WRKY
c118835_g1	SWI/SNF-BAF60b
c127974_g2	C2C2-Dof
c133244_g2	LIM
c134853_g1	WRKY
c136316_g2	SNF2
c130649_g1	Tify
c130804_g1	AUX/IAA
c134285_g1	TCP
c118972_g1	SBP
c130049_g1	G2-like
c132973_g1	Jumonji
c160624_g1	TRAF
c131980_g2	SNF2
c108639_g1	CCAAT
c131317_g1	MBF1
c136170_g1	TAZ
c119303_g1	bHLH
c126813_g1	LOB
c129643_g3	ABI3VP1
c124845_g1	MADS
c131462_g2	C2H2
c118115_g1	HB
c129555_g2	zf-HD
c121830_g1	C2C2-GATA
c104895_g2	C3H
c21564_g1	bZIP
c129850_g1	MADS
c136721_g1	CCAAT
c110992_g1	CCAAT
c287628_g1	Coactivator p15
c134509_g1	MYB
c121400_g1	MYB
c121083_g1	bZIP
c126549_g2	MYB
c135028_g4	SET
c132488_g2	C2H2
c132394_g2	SET
c225957_g1	NAC
c130414_g4	MYB
c125343_g2	ARID
c132721_g1	FAR1
c119023_g1	MYB
c125060_g1	C2C2-Dof
c113988_g1	CCAAT
c135981_g4	SRS
c104179_g1	Orphans
c61742_g1	NAC
c135802_g1	FAR1
c18966_g1	SET
c135232_g2	GRF
c107989_g1	bHLH
c321920_g1	zf-HD
c135315_g2	NAC
c7455_g1	MBF1
c296273_g1	Coactivator p15
c123769_g1	NAC
c129694_g1	TCP
c135684_g1	SNF2
c136822_g1	DDT
c135140_g2	IWS1
c126523_g1	SWI/SNF-BAF60b
c192122_g1	Orphans
c132726_g3	bHLH
c135973_g2	C3H
c125981_g1	C3H
c133676_g5	HB
c128299_g2	MYB
c228182_g1	C3H
c120242_g1	MYB
c127916_g2	ABI3VP1
c124033_g1	AP2-EREBP
c131904_g3	DDT
c127337_g1	bHLH
c130585_g1	GRAS
c162810_g1	G2-like
c126304_g5	AP2-EREBP
c122445_g3	C2H2
c18206_g1	C3H
c176782_g1	MYB
c131732_g1	MYB
c107012_g1	IWS1
c121930_g1	C3H
c60126_g1	FHA
c99957_g2	CCAAT
c136847_g1	bZIP
c126473_g5	MYB
c38829_g1	HMG
c108437_g1	C2H2
c135382_g1	TRAF
c141804_g1	MYB
c75644_g1	ABI3VP1
c127366_g1	WRKY
c76037_g2	Jumonji
c134980_g1	FAR1
c127288_g1	AP2-EREBP
c123538_g1	G2-like
c121906_g1	BBR/BPC
c123983_g1	ABI3VP1
c96529_g1	Orphans
c130820_g2	SET
c108083_g2	ABI3VP1
c133891_g2	C2C2-Dof
c130388_g2	CCAAT
c123151_g1	zf-HD
c114396_g1	bZIP
c77102_g1	HMG
c80903_g1	C3H
c126281_g1	ABI3VP1
c115579_g2	FAR1
c129508_g1	mTERF
c129451_g2	AP2-EREBP
c135274_g5	GNAT
c19415_g1	HSF
c123985_g2	Orphans
c126757_g1	bZIP
c135909_g1	FAR1
c131672_g2	C3H
c131936_g1	Jumonji
c133571_g1	C3H
c174473_g1	C3H
c134265_g3	bHLH
c127925_g2	CCAAT
c134670_g1	BSD
c118534_g1	TRAF
c130170_g2	C2C2-GATA
c110362_g1	mTERF
c130746_g3	MYB
c129662_g2	bZIP
c76004_g2	ABI3VP1
c279749_g1	TUB
c135987_g1	HB
c133244_g5	Orphans
c134612_g2	ARF
c123891_g1	bZIP
c134434_g1	Orphans
c127355_g2	NAC
c67958_g1	MYB
c133443_g2	MYB
c103493_g1	LUG
c123198_g1	C2C2-GATA
c131120_g1	Orphans
c122265_g1	C2C2-GATA
c107633_g1	mTERF
c124430_g1	TRAF
c133828_g1	zf-HD
c132684_g1	bHLH
c94684_g1	bHLH
c82499_g2	GRAS
c123986_g1	bHLH
c132993_g2	Alfin-like
c125938_g2	AP2-EREBP
c81912_g1	AUX/IAA
c131958_g1	mTERF
c126912_g2	Trihelix
c323586_g1	C2H2
c217886_g1	C2C2-YABBY
c106009_g1	Jumonji
c134943_g2	C2C2-YABBY
c121987_g1	VOZ
c136841_g3	SET
c128403_g1	HMG
c108768_g1	CSD
c134288_g1	HMG
c135539_g1	HB
c123881_g1	Orphans
c133962_g1	MYB
c119325_g1	SBP
c135033_g1	Orphans
c31007_g1	MADS
c75346_g1	Orphans
c135229_g1	SBP
c136266_g2	E2F-DP
c134460_g2	HSF
c131841_g1	GRAS
c123513_g1	bZIP
c133575_g1	HB
c131860_g1	E2F-DP
c132180_g1	ABI3VP1
c126881_g1	Coactivator p15
c132103_g2	bHLH
c131911_g1	GRAS
c134792_g1	TCP
c101590_g1	HMG
c134950_g2	PHD
c123011_g1	TCP
c135790_g3	HMG
c183516_g1	C2H2
c134637_g1	SNF2
c127089_g1	C2C2-Dof
c78458_g1	C2C2-YABBY
c110862_g2	GRAS
c313354_g1	FHA
c73651_g1	C2C2-GATA
c135715_g3	OFP
c130491_g2	bHLH
c136471_g3	Orphans
c279002_g1	C2H2
c114007_g1	NAC
c113669_g1	AUX/IAA
c135053_g2	C2C2-GATA
c140017_g1	C2H2
c27654_g1	CCAAT
c134456_g1	TAZ
c126071_g2	NAC
c134709_g2	SNF2
c99207_g1	bZIP
c116035_g1	C3H
c135629_g2	GRAS
c90943_g1	bHLH
c110671_g1	Tify
c130495_g1	mTERF
c109792_g1	C3H
c127037_g1	C2C2-GATA
c128597_g2	GNAT
c262496_g1	bZIP
c320346_g1	TUB
c123985_g1	Tify
c121880_g2	AP2-EREBP
c122632_g1	PLATZ
c134510_g2	Trihelix
c119047_g2	MYB
c96729_g1	AUX/IAA
c96459_g1	HB
c257239_g1	MBF1
c105322_g1	LOB
c115778_g1	bZIP
c134569_g4	CCAAT
c128834_g2	CCAAT
c134343_g1	WRKY
c128156_g1	Trihelix
c127547_g1	AP2-EREBP
c136622_g1	PHD
c132433_g2	C3H
c287116_g1	LUG
c134306_g1	ABI3VP1
c120645_g2	GRAS
c128610_g2	HMG
c108665_g1	OFP
c129112_g1	WRKY
c111095_g1	bHLH
c135936_g2	MYB
c118174_g1	GRAS
c126661_g2	C2C2-Dof
c118437_g1	MADS
c128784_g1	C3H
c106031_g1	ABI3VP1
c129643_g4	ABI3VP1
c124124_g1	NAC
c86899_g1	HB
c123172_g1	Orphans
c121577_g1	C2C2-Dof
c130894_g1	AUX/IAA
c129487_g1	AUX/IAA
c70079_g1	C3H
c41247_g1	SNF2
c140849_g1	CPP
c114378_g2	CCAAT
c106245_g1	ARF
c60807_g1	MYB
c125012_g3	SBP
c114710_g1	MYB
c115275_g2	AUX/IAA
c132071_g4	WRKY
c119425_g1	AP2-EREBP
c128080_g1	ABI3VP1
c134472_g2	C3H
c125141_g1	HMG
c128797_g3	AP2-EREBP
c125460_g1	MADS
c71398_g1	TCP
c124250_g1	mTERF
c120789_g2	bZIP
c134843_g1	SNF2
c132183_g3	MYB
c122580_g1	bHLH
c134674_g1	HB
c128797_g5	AP2-EREBP
c136276_g1	TCP
c99997_g1	bHLH
c111857_g1	MBF1
c133555_g2	AP2-EREBP
c132436_g1	MYB
c110957_g1	C2C2-YABBY
c102413_g1	bHLH
c59043_g1	MYB
c120395_g1	Orphans
c80783_g1	MYB
c134721_g1	TCP
c101475_g1	bZIP
c91180_g1	FHA
c111609_g1	C2C2-Dof
c117921_g1	MYB
c109547_g1	FHA
c129288_g3	HMG
c123854_g3	LOB
c134117_g1	SNF2
c60675_g1	Orphans
c121286_g1	MADS
c131762_g4	AP2-EREBP
c114911_g1	Orphans
c117087_g1	HB
c132463_g1	GNAT
c117928_g1	MADS
c135925_g1	GNAT
c123922_g1	GNAT
c116089_g1	ABI3VP1
c124210_g1	HB
c123124_g1	LOB
c135627_g2	SET
c136411_g2	MYB
c132680_g5	C2C2-Dof
c131769_g4	MYB
c130387_g2	C2C2-YABBY
c131376_g1	WRKY
c105179_g1	ABI3VP1
c98623_g1	MYB
c2615_g1	HSF
c118403_g3	BES1
c132820_g1	MYB
c122820_g1	TUB
c124165_g5	MADS
c111995_g1	TIG
c136023_g1	C2H2
c135537_g1	ABI3VP1
c128506_g1	WRKY
c131505_g1	bZIP
c118797_g1	AP2-EREBP
c123521_g1	AP2-EREBP
c135131_g2	C3H
c123650_g1	Tify
c124441_g1	WRKY
c132796_g1	GRAS
c290652_g1	C3H
c130541_g2	G2-like
c129871_g1	GNAT
c120972_g1	MADS
c132658_g1	ARID
c134926_g2	bHLH
c208327_g1	SET
c122463_g1	HB
c118870_g1	C3H
c122269_g1	HB
c136076_g1	ARF
c121872_g1	PHD
c61330_g1	CSD
c124440_g1	bHLH
c126262_g1	SWI/SNF-BAF60b
c132885_g2	HB
c132783_g2	C2C2-GATA
c125109_g2	GeBP
c136167_g1	MYB
c320892_g1	HMG
c121982_g1	CCAAT
c127570_g1	C2H2
c55343_g1	MADS
c127604_g1	GRAS
c127319_g1	WRKY
c127598_g2	CCAAT
c209336_g1	bZIP
c90634_g1	HB
c109478_g1	WRKY
c131738_g1	ABI3VP1
c136571_g1	mTERF
c133432_g2	GRAS
c87645_g1	CSD
c324737_g1	HMG
c131462_g1	C2H2
c124075_g3	MYB
c136275_g2	SWI/SNF-SWI3
c89653_g1	LIM
c115494_g1	CCAAT
c136738_g1	ABI3VP1
c102946_g1	MADS
c103304_g1	MADS
c85252_g1	CSD
c133729_g1	PHD
c135187_g1	Jumonji
c72868_g1	LIM
c136639_g3	ARID
c122483_g1	MYB
c212867_g1	MYB
c127571_g2	ARF
c113450_g1	HMG
c124692_g1	C2C2-GATA
c136369_g1	SNF2
c134145_g1	mTERF
c128937_g1	TRAF
c19505_g1	FHA
c125844_g1	GRAS
c124382_g1	WRKY
c128307_g1	BSD
c143633_g1	C2C2-GATA
c132638_g2	NAC
c136478_g1	PHD
c106561_g1	C2C2-Dof
c125339_g1	HB
c122444_g1	C3H
c136831_g1	SNF2
c314258_g1	C3H
c118525_g1	bHLH
c133151_g1	MYB
c132662_g2	GRAS
c119774_g1	AP2-EREBP
c97861_g2	HB
c91640_g1	GNAT
c122030_g1	C3H
c133891_g1	C2C2-Dof
c122836_g1	HB
c113526_g1	TIG
c126690_g3	Orphans
c333875_g1	CCAAT
c134510_g2	HB
c119414_g1	ABI3VP1
c172145_g1	C3H
c135130_g3	HB
c106109_g1	Orphans
c101997_g1	AP2-EREBP
c126665_g2	C3H
c84074_g2	bZIP
c118344_g1	MYB
c49463_g1	HSF
c118377_g1	WRKY
c124049_g2	NAC
c213105_g1	Orphans
c89980_g1	FHA
c111141_g1	Jumonji
c134571_g4	FAR1
c135068_g1	C3H
c134903_g1	SET
c132991_g2	Trihelix
c124075_g1	MYB
c317676_g1	C2H2
c135028_g3	SET
c132853_g2	MYB
c14216_g1	ABI3VP1
c126972_g1	Trihelix
c132440_g2	Orphans
c224166_g1	C3H
c129089_g1	Tify
c123292_g1	NAC
c120833_g1	C2H2
c129867_g1	SWI/SNF-BAF60b
c149658_g1	C3H
c127250_g1	TUB
c135771_g3	MADS
c110954_g1	NAC
c94293_g1	MADS
c131180_g2	SRS
c136181_g1	ARF
c135772_g1	SET
c123601_g1	AP2-EREBP
c134180_g3	Orphans
c121186_g1	LOB
c93618_g1	HMG
c82846_g1	C2H2
c46252_g1	GNAT
c98236_g1	C2C2-GATA
c93085_g1	Orphans
c103829_g1	AUX/IAA
c136893_g1	bZIP
c130153_g5	mTERF
c116838_g1	C2H2
c115480_g2	C2H2
c125958_g1	OFP
c119651_g1	OFP
c122637_g1	mTERF
c118387_g1	CCAAT
c113313_g1	bHLH
c130148_g1	CPP
c132586_g3	Tify
c126279_g1	MYB
c104747_g1	HSF
c81306_g1	bZIP
c117331_g2	MYB
c121787_g1	HB
c133916_g2	CCAAT
c134914_g1	NAC
c124562_g1	bHLH
c136168_g1	Trihelix
c136521_g2	Trihelix
c132354_g5	Orphans
c251345_g1	bZIP
c131633_g2	AUX/IAA
c116369_g1	bHLH
c116754_g1	Tify
c119509_g1	bHLH
c132839_g2	MYB
c235011_g1	C3H
c132618_g1	C3H
c135524_g1	Trihelix
c126473_g3	MYB
c135464_g1	FAR1
c122208_g1	bHLH
c118735_g1	PLATZ
c126537_g2	GRAS
c123588_g1	CAMTA
c119706_g1	C2C2-Dof
c40744_g1	C2H2
c131363_g2	C3H
c129653_g3	MADS
c129759_g1	Rcd1-like
c136713_g1	mTERF
c116563_g1	VOZ
c127208_g1	SBP
c135119_g2	MYB
c126661_g3	MYB
c124285_g2	G2-like
c120087_g1	AP2-EREBP
c333564_g1	FHA
c129050_g1	FHA
c126352_g1	GNAT
c92162_g1	LIM
c134768_g2	HB
c136521_g1	Orphans
c61609_g1	FHA
c135014_g1	NAC
c131567_g1	MYB
c129303_g1	bZIP
c130003_g3	GNAT
c127790_g2	SBP
c117283_g1	MADS
c130677_g4	OFP
c118923_g3	Orphans
c2278_g1	bHLH
c191519_g1	C3H
c129845_g1	bZIP
c79507_g1	AP2-EREBP
c127827_g3	MYB
c136908_g1	mTERF
c131169_g1	SNF2
c95524_g1	GRAS
c135612_g1	MADS
c135318_g1	Orphans
c133108_g1	HB
c135990_g1	SET
c128565_g2	MYB
c172125_g1	FHA
c129350_g2	ABI3VP1
c83537_g1	FHA
c60634_g1	BBR/BPC
c135007_g1	PHD
c127287_g2	PLATZ
c135475_g1	SNF2
c132879_g2	C2C2-GATA
c133003_g1	AUX/IAA
c124859_g1	NAC
c133462_g1	FHA
c139620_g1	ABI3VP1
c116853_g3	TIG
c125012_g1	SBP
c131996_g1	WRKY
c121591_g1	AP2-EREBP
c131032_g1	C3H
c122847_g1	PHD
c129715_g3	MED6
c128296_g1	CCAAT
c158680_g1	TIG
c131585_g1	FAR1
c129653_g7	MADS
c135317_g2	FHA
c135019_g1	LOB
c135674_g1	CCAAT
c125676_g1	SET
c135059_g1	ABI3VP1
c130700_g1	ARID
c125909_g2	PHD
c123157_g1	CCAAT
c83137_g2	NAC
c128789_g1	AP2-EREBP
c129082_g1	SET
c133801_g1	GRAS
c136396_g1	Jumonji
c122445_g1	C2H2
c210657_g1	TRAF
c259151_g1	bHLH
c118301_g1	NAC
c126011_g1	WRKY
c178437_g1	AUX/IAA
c255390_g1	Orphans
c127321_g2	GRAS
c133655_g4	AP2-EREBP
c129505_g4	HSF
c129067_g1	C3H
c123277_g1	OFP
c136492_g1	FAR1
c119486_g1	NAC
c118377_g4	WRKY
c2354_g1	TUB
c130748_g2	AP2-EREBP
c128327_g4	GRAS
c125607_g1	AUX/IAA
c118381_g1	MADS
c188798_g1	MYB
c115720_g1	SET
c124624_g1	AP2-EREBP
c174900_g1	SWI/SNF-SWI3
c128417_g1	C3H
c120156_g1	bHLH
c143322_g1	C2H2
c107909_g2	SNF2
c127382_g1	Orphans
c97518_g1	GeBP
c123022_g1	NAC
c121498_g6	FAR1
c136714_g1	NAC
c120319_g1	FAR1
c130107_g1	C3H
c89631_g1	bHLH
c128955_g1	AUX/IAA
c121670_g1	C2H2
c127021_g1	GRAS
c134089_g6	C2C2-YABBY
c126032_g1	ABI3VP1
c129906_g1	G2-like
c96829_g1	C2H2
c335066_g1	Orphans
c82192_g1	CSD
c27338_g1	Jumonji
c131942_g1	bHLH
c129887_g1	E2F-DP
c124612_g3	PHD
c135650_g2	LOB
c132491_g3	SNF2
c135362_g2	GNAT
c123913_g2	C2C2-Dof
c134133_g1	HB
c86538_g1	SWI/SNF-SWI3
c136687_g2	Orphans
c118965_g2	MYB
c131273_g1	FAR1
c119447_g1	SWI/SNF-BAF60b
c127853_g1	C2H2
c133524_g1	mTERF
c316644_g1	HSF
c78433_g1	Tify
c116034_g1	AP2-EREBP
c132957_g1	MYB
c126629_g1	HMG
c138706_g1	SWI/SNF-BAF60b
c132071_g2	WRKY
c121841_g1	C2H2
c132130_g1	TCP
c86764_g1	CCAAT
c125451_g1	C3H
c78240_g1	HMG
c129477_g1	SBP
c210433_g1	HMG
c108657_g2	C2H2
c135053_g2	Tify
c321426_g1	MYB
c136761_g1	SWI/SNF-SWI3
c109578_g1	MYB
c126085_g2	FAR1
c126458_g1	Orphans
c136663_g1	MYB
c124675_g1	Tify
c131016_g2	ARF
c122062_g1	TRAF
c83794_g1	TUB
c130294_g1	C3H
c98487_g1	Orphans
c135466_g1	HSF
c73547_g1	CCAAT
c119329_g1	ABI3VP1
c130982_g1	AP2-EREBP
c38783_g2	C3H
c126112_g1	C3H
c94488_g1	MYB
c136386_g3	C2H2
c133176_g2	bZIP
c78203_g1	C2C2-YABBY
c84166_g2	MYB
c132062_g1	bHLH
c81975_g1	LIM
c122570_g1	Trihelix
c122838_g1	OFP
c135502_g2	FAR1
c134929_g2	DDT
c133418_g1	MYB
c103349_g1	NAC
c133769_g1	HB
c129653_g5	MADS
c135782_g3	MYB
c228489_g1	MYB
c278898_g1	ABI3VP1
c105677_g2	C2H2
c132584_g2	Jumonji
c127492_g5	MYB
c132023_g1	NAC
c127632_g1	C2H2
c125240_g1	C3H
c120911_g1	C3H
c120693_g1	NAC
c130629_g1	LOB
c126842_g2	NAC
c152698_g1	C3H
c131831_g1	GRAS
c132153_g2	AUX/IAA
c133056_g1	Jumonji
c125751_g1	C3H
c142076_g1	C2H2
c131413_g1	SET
c143114_g1	zf-HD
c127350_g2	C2H2
c269743_g1	C3H
c114013_g1	Orphans
c136816_g2	MYB
c124178_g1	FAR1
c134055_g1	GRAS
c129150_g1	SNF2
c119447_g2	SWI/SNF-BAF60b
c107261_g1	LOB
c135200_g2	AUX/IAA
c128068_g2	MYB
c220234_g1	C3H
c125453_g2	AP2-EREBP
c126555_g1	HMG
c98661_g1	MADS
c226518_g1	HSF
c186257_g1	C2H2
c127089_g4	C2C2-Dof
c122005_g1	HSF
c126340_g2	FAR1
c243598_g1	Orphans
c131856_g2	HB
c122091_g2	Trihelix
c122065_g1	E2F-DP
c130767_g2	GNAT
c132724_g3	bHLH
c110600_g1	MYB
c135935_g2	GRAS
c116580_g1	HSF
c135860_g2	PHD
c136904_g2	mTERF
c132433_g1	C3H
c101792_g1	CCAAT
c262656_g1	E2F-DP
c135509_g6	HSF
c114199_g1	bZIP
c136250_g2	WRKY
c125048_g1	MADS
c134433_g4	RWP-RK
c136848_g2	GRAS
c122515_g1	GNAT
c136148_g1	HMG
c120766_g1	SRS
c119254_g1	bHLH
c126772_g2	CCAAT
c113095_g1	MYB
c121360_g1	Jumonji
c137276_g1	C3H
c131961_g2	SBP
c220040_g1	Orphans
c287377_g1	PHD
c129367_g2	MBF1
c99507_g1	C3H
c120260_g2	bZIP
c207820_g1	C2H2
c130322_g4	GRAS
c320831_g1	Jumonji
c117335_g1	NAC
c122448_g2	WRKY
c125453_g4	AP2-EREBP
c111824_g1	CSD
c129523_g5	LUG
c133151_g2	MYB
c133891_g4	C2C2-Dof
c131888_g1	FAR1
c135227_g1	C3H
c136827_g1	Orphans
c129742_g1	HB
c27728_g1	MADS
c122729_g1	Orphans
c122743_g1	MYB
c128231_g3	ABI3VP1
c84743_g1	AP2-EREBP
c125930_g2	Trihelix
c124331_g1	AUX/IAA
c127007_g1	HB
c124989_g4	TRAF
c124179_g1	AP2-EREBP
c113698_g1	C3H
c128231_g2	ABI3VP1
c129780_g1	C2C2-Dof
c115453_g2	WRKY
c24431_g2	C2H2
c117718_g1	AUX/IAA
c112591_g1	bZIP
c136386_g4	C2H2
c126071_g1	NAC
c134339_g2	SBP
c131890_g1	Trihelix
c132993_g2	MYB
c316738_g1	Orphans
c30212_g1	HB
c122352_g1	GRF
c125177_g1	bHLH
c119357_g1	LOB
c125305_g1	Coactivator p15
c113959_g1	HMG
c130011_g4	HB
c132668_g1	MADS
c60075_g1	bZIP
c120856_g1	MYB
c128442_g1	bZIP
c121736_g2	CCAAT
c120257_g1	zf-HD
c128633_g3	MYB
c78189_g1	HMG
c133321_g1	ARF
c136900_g1	Trihelix
c132416_g1	SNF2
c128445_g2	bHLH
c136655_g2	bZIP
c126390_g1	ABI3VP1
c120696_g1	zf-HD
c123117_g1	HB
c124049_g1	NAC
c110561_g1	AP2-EREBP
c134506_g2	FHA
c134933_g1	Jumonji
c126128_g1	SET
c114000_g1	OFP
c129643_g5	ABI3VP1
c133875_g2	Pseudo ARR-B
c126478_g3	Jumonji
c121886_g1	AP2-EREBP
c124576_g1	AUX/IAA
c125148_g1	C2C2-GATA
c122076_g1	WRKY
c136188_g8	IWS1
c135125_g1	PHD
c129043_g1	SNF2
c136105_g1	ARR-B
c130658_g2	CCAAT
c114546_g1	CSD
c121457_g1	C2H2
c136318_g2	ULT
c122353_g4	GRAS
c136340_g1	C2H2
c128638_g2	bHLH
c132556_g1	SET
c134451_g2	FAR1
c191506_g1	RB
c127435_g1	mTERF
c130422_g1	LOB
c91896_g1	HMG
c99047_g2	SBP
c135082_g2	WRKY
c107961_g1	G2-like
c130575_g1	C2H2
c25794_g1	C3H
c134580_g2	HB
c136649_g1	NAC
c132192_g2	PHD
c129260_g1	AP2-EREBP
c132271_g1	mTERF
c262290_g1	Orphans
c83411_g1	ABI3VP1
c128565_g1	G2-like
c135568_g1	OFP
c132169_g3	C3H
c133493_g2	PHD
c129887_g1	WRKY
c249145_g1	C2H2
c125695_g2	TRAF
c134769_g2	Orphans
c126951_g1	MYB
c136636_g1	C3H
c131680_g4	ARF
c86600_g1	HB
c130387_g3	C2C2-YABBY
c185491_g1	HSF
c115388_g1	C2H2
c134823_g1	C3H
c125514_g1	AP2-EREBP
c136275_g1	IWS1
c123782_g1	AP2-EREBP
c129299_g1	mTERF
c15454_g1	NAC
c134344_g1	TUB
c85282_g1	HMG
c130595_g2	Coactivator p15
c121956_g1	S1Fa-like
c107875_g2	MYB
c119210_g1	WRKY
c132215_g1	Orphans
c134523_g3	Orphans
c120247_g2	bHLH
c126413_g1	mTERF
c118315_g1	Orphans
c115132_g1	zf-HD
c132942_g1	SNF2
c131533_g1	TCP
c124399_g2	PHD
c119719_g1	C2H2
c131755_g2	OFP
c130975_g1	mTERF
c124733_g1	WRKY
c131994_g1	GRAS
c279603_g1	HMG
c121117_g1	C2H2
c135409_g1	BSD
c136898_g2	G2-like
c127377_g2	ABI3VP1
c135680_g1	SET
c128055_g1	SET
c131616_g1	GRAS
c83933_g1	LIM
c123384_g1	MYB
c134081_g1	SOH1
c97988_g2	MYB
c136157_g1	GNAT
c142621_g1	FHA
c128196_g1	ARF
c135459_g1	C3H
c133747_g1	MYB
c133314_g3	MYB
c131883_g1	CPP
c14176_g1	C3H
c129974_g1	HB
c132364_g1	AUX/IAA
c124663_g2	AUX/IAA
c134484_g1	ABI3VP1
c121434_g1	AUX/IAA
c184010_g1	NAC
c96509_g1	SNF2
c122696_g1	HB
c134323_g1	RB
c128857_g2	bHLH
c135590_g2	SET
c90255_g1	C2C2-GATA
c125329_g1	WRKY
c134866_g1	SNF2
c100105_g1	Orphans
c128633_g4	MYB
c123813_g1	EIL
c132588_g1	C2H2
c134203_g2	Orphans
c130093_g1	HSF
c127498_g1	Orphans
c133120_g2	Jumonji
c113960_g1	C2H2
c111995_g2	TIG
c131820_g3	CCAAT
c129383_g5	bHLH
c86602_g1	C3H
c132887_g1	NAC
c123918_g1	AP2-EREBP
c302590_g1	C2H2
c134830_g1	LOB
c133297_g1	Sigma70-like
c124386_g2	Trihelix
c119476_g2	IWS1
c109593_g1	HB
c136655_g3	bZIP
c124278_g1	bZIP
c96973_g2	HMG
c3781_g1	zf-HD
c103309_g1	C2H2
c104098_g1	HMG
c99155_g2	Trihelix
c123425_g1	MADS
c130984_g1	C2C2-GATA
c125607_g3	AUX/IAA
c99166_g1	C2H2
c127034_g1	MYB
c122595_g3	G2-like
c79954_g1	C3H
c127805_g1	TRAF
c118758_g1	LOB
c128290_g1	bZIP
c133082_g2	mTERF
c103038_g1	C2H2
c128089_g2	WRKY
c113505_g1	Orphans
c116771_g1	NAC
c258959_g1	CCAAT
c118691_g1	ARF
c122595_g2	G2-like
c152646_g1	Orphans
c254630_g1	CSD
c10916_g1	LIM
c132439_g1	MYB
c123666_g1	C2H2
c90914_g1	MADS
c112485_g1	WRKY
c86956_g1	bHLH
c130069_g2	MYB
c124238_g1	bHLH
c129731_g1	AP2-EREBP
c2413_g1	bZIP
c131777_g3	G2-like
c110041_g1	AP2-EREBP
c122681_g1	mTERF
c221474_g1	CCAAT
c120862_g1	CCAAT
c120157_g2	C3H
c126906_g1	C2C2-CO-like
c41722_g1	C2H2
c102460_g1	C2C2-GATA
c99032_g1	WRKY
c129323_g1	MYB
c136865_g1	WRKY
c132071_g5	bZIP
c154967_g1	C3H
c121011_g1	Trihelix
c129118_g1	C2C2-YABBY
c133333_g1	C3H
c132243_g1	LOB
c121905_g1	ARID
c130932_g1	bZIP
c100446_g1	C2H2
c121196_g2	AP2-EREBP
c133847_g1	G2-like
c140065_g1	Orphans
c136340_g1	Jumonji
c114558_g1	MYB
c135305_g1	PHD
c26529_g1	SWI/SNF-BAF60b
c134208_g2	CCAAT
c135009_g2	SWI/SNF-BAF60b
c133665_g1	mTERF
c119441_g1	AP2-EREBP
c118556_g1	C2C2-CO-like
c125450_g1	GNAT
c127684_g2	NAC
c130197_g3	IWS1
c102667_g1	C3H
c103376_g1	LIM
c117738_g1	ABI3VP1
c57883_g1	HB
c127175_g3	Orphans
c122860_g1	AP2-EREBP
c121315_g1	LOB
c116865_g1	ABI3VP1
c98927_g1	HMG
c125943_g1	NAC
c118743_g1	TIG
c128633_g2	MYB
c123668_g1	PHD
c96604_g1	Orphans
c117398_g2	PHD
c97025_g1	MYB
c20172_g1	HMG
c128400_g1	MADS
c180000_g1	FHA
c101743_g1	FHA
c95774_g1	C3H
c121272_g1	GNAT
c129594_g1	WRKY
c103459_g1	HMG
c131359_g2	HB
c116968_g1	bZIP
c134431_g2	C3H
c136286_g4	SET
c135199_g1	Jumonji
c127723_g1	C3H
c130414_g3	MYB
c124620_g2	GNAT
c73437_g1	C2H2
c120719_g1	bHLH
c124075_g2	MYB
c120701_g1	bHLH
c118114_g1	OFP
c219668_g1	HMG
c117528_g1	MYB
c122242_g2	Alfin-like
c127038_g2	TCP
c133149_g1	G2-like
c126225_g1	C2C2-Dof
c135649_g1	ARR-B
c131513_g1	bZIP
c126872_g1	NAC
c86616_g1	bZIP
c135554_g1	Orphans
c58568_g1	CCAAT
c125612_g1	WRKY
c122653_g3	MADS
c301947_g1	CSD
c14139_g1	GRAS
c134449_g3	C2C2-GATA
c128611_g2	Tify
c132594_g1	TRAF
c127093_g1	Trihelix
c116032_g1	AP2-EREBP
c128680_g2	NAC
c125150_g3	bHLH
c133745_g1	C2C2-Dof
c135388_g1	FHA
c136601_g1	GeBP
c118377_g2	WRKY
c128798_g1	FAR1
c131599_g1	CCAAT
c135398_g1	BES1
c122612_g2	Orphans
c114122_g1	bZIP
c124627_g3	NAC
c117605_g1	AP2-EREBP
c124143_g1	bZIP
c115463_g1	LOB
c136034_g2	HB
c103426_g1	mTERF
c134017_g1	NAC
c228273_g1	CCAAT
c134485_g1	C3H
c129360_g2	Orphans
c124584_g1	SWI/SNF-BAF60b
c104212_g1	AUX/IAA
c80884_g1	LUG
c124399_g3	SET
c127690_g1	bHLH
c288316_g1	TRAF
c136825_g1	SET
c120340_g1	HB
c134344_g2	TUB
c123736_g1	C3H
c127430_g1	SNF2
c132927_g5	GRAS
c105329_g1	CSD
c126697_g1	IWS1
c65099_g1	HMG
c48840_g1	bZIP
c122148_g1	C2H2
c134950_g1	PHD
c76984_g1	MYB
c129822_g1	HMG
c133524_g2	mTERF
c124699_g1	C2H2
c125231_g1	HB
c131015_g2	bHLH
c122491_g2	MYB
c136851_g2	SET
c15689_g1	C2H2
c25315_g1	E2F-DP
c133355_g1	DDT
c128480_g1	C2H2
c129822_g1	ARID
c126202_g3	C2H2
c136435_g3	GNAT
c118427_g1	AUX/IAA
c124395_g1	CCAAT
c117837_g1	AUX/IAA
c131145_g2	C2H2
c126998_g1	MYB
c214267_g1	MYB
c173090_g1	ABI3VP1
c119639_g1	NAC
c25722_g1	HMG
c135264_g2	mTERF
c127969_g1	CCAAT
c129569_g1	NAC
c128288_g2	TRAF
c123654_g1	PHD
c123020_g1	HB
c132785_g4	C2C2-Dof
c126514_g4	WRKY
c136641_g2	FAR1
c6081_g1	HMG
c129383_g2	bHLH
c127916_g2	ARF
c132646_g1	C3H
c121099_g1	AP2-EREBP
c251926_g1	LUG
c129653_g4	MADS
c123749_g1	C2C2-GATA
c130170_g3	C2C2-GATA
c59883_g1	FHA
c126588_g1	Orphans
c108652_g1	GNAT
c117718_g2	AUX/IAA
c26592_g1	AP2-EREBP
c129267_g1	SET
c132096_g1	TRAF
c50342_g1	AUX/IAA
c106759_g1	CCAAT
c108838_g2	Orphans
c15208_g1	C2H2
c134523_g1	LIM
c330758_g1	Orphans
c121364_g1	bHLH
c335588_g1	AUX/IAA
c136305_g1	mTERF
c289118_g1	C2H2
c124547_g4	AUX/IAA
c216651_g1	E2F-DP
c121368_g1	PHD
c124661_g1	PLATZ
c116230_g1	TRAF
c104569_g1	AUX/IAA
c95143_g2	TRAF
c127909_g1	SET
c125747_g2	ARR-B
c1757_g1	SNF2
c121566_g2	AP2-EREBP
c255259_g1	HMG
c128496_g1	bHLH
c124869_g2	C2C2-Dof
c127598_g1	CCAAT
c116145_g1	Orphans
c133353_g2	FHA
c126472_g2	HB
c122632_g2	PLATZ
c135953_g4	TUB
c120910_g1	NAC
c132680_g4	C2H2
c129958_g2	mTERF
c136859_g1	mTERF
c132986_g2	C2H2
c130484_g2	FHA
c134440_g1	PBF-2-like
c135631_g2	FAR1
c129351_g1	AUX/IAA
c130723_g4	bZIP
c92420_g1	TRAF
c129834_g1	C2C2-GATA
c123853_g1	NAC
c128573_g1	MYB
c132945_g1	FAR1
c129653_g8	MADS
c121739_g1	AP2-EREBP
c123292_g2	NAC
c135424_g1	SNF2
c134227_g4	AP2-EREBP
c132308_g1	Trihelix
c125442_g1	MYB
c113752_g1	TIG
c123143_g1	FHA
c52449_g1	MYB
c248733_g1	MYB
c120755_g1	ABI3VP1
c136564_g1	HB
c127916_g3	ABI3VP1
c130481_g3	CCAAT
c133003_g1	ARF
c134182_g1	bZIP
c118216_g1	MYB
c136070_g5	RWP-RK
c213805_g1	CPP
c131667_g1	TCP
c121770_g1	MYB
c127393_g1	Orphans
c109944_g1	NAC
c116377_g1	C2C2-YABBY
c131059_g1	GRAS
c112924_g1	C3H
c136329_g1	SWI/SNF-BAF60b
c145734_g1	C3H
c124916_g1	C3H
c128994_g4	OFP
c135963_g1	bZIP
c106070_g1	bHLH
c120924_g1	MYB
c119259_g1	HMG
c41680_g1	TRAF
c123942_g1	GNAT
c120730_g1	Orphans
c99189_g1	GRAS
c128891_g1	bHLH
c83093_g1	C2H2
c133366_g1	OFP
c132400_g1	VOZ
c123834_g1	NAC
c122782_g1	HB
c133477_g1	PHD
c124471_g2	MYB
c132551_g3	WRKY
c127735_g2	Alfin-like
c132745_g2	AP2-EREBP
c136563_g1	GNAT
c110988_g2	HB
c121687_g1	NAC
c126556_g1	BBR/BPC
c126104_g1	MYB
c133500_g1	AUX/IAA
c126498_g1	mTERF
c131124_g1	WRKY
c259547_g1	bZIP
c129643_g1	ABI3VP1
c136586_g1	MYB
c129899_g1	AP2-EREBP
c252517_g1	SET
c109892_g1	bZIP
c126975_g1	C2C2-GATA
c130387_g1	C2C2-YABBY
c123273_g1	GNAT
c133971_g3	AP2-EREBP
c287258_g1	MYB
c130732_g2	CSD
c120605_g1	Orphans
c135745_g2	MYB
c118158_g1	HB
c133915_g1	G2-like
c120205_g1	C2H2
c223527_g1	AUX/IAA
c58733_g1	Orphans
c117648_g1	bZIP
c123989_g1	bHLH
c64688_g1	MYB
c120100_g1	BBR/BPC
c121329_g2	CCAAT
c132186_g1	TRAF
c136886_g1	SNF2
c115453_g1	WRKY
c27183_g1	C2H2
c125678_g2	FHA
c132335_g2	MYB
c134333_g2	Jumonji
c135981_g3	SRS
c122482_g1	MADS
c132029_g1	SNF2
c103889_g1	AP2-EREBP
c129415_g1	HB
c133624_g1	GRAS
c111681_g1	CCAAT
c132433_g3	C3H
c132192_g1	bHLH
c133214_g1	Jumonji
c124314_g1	AP2-EREBP
c130471_g1	Tify
c115074_g1	LOB
c83778_g1	Orphans
c131769_g2	MYB
c320462_g1	ARF
c125858_g1	Orphans
c124628_g5	HB
c123399_g2	TAZ
c121606_g4	AP2-EREBP
c316493_g1	CPP
c133804_g2	RWP-RK
c119214_g1	NAC
c136427_g1	SET
c107030_g1	HSF
c301792_g1	HSF
c123175_g1	NAC
c53133_g1	HB
c133389_g1	C2H2
c132929_g1	G2-like
c125913_g1	bZIP
c121333_g2	NAC
c131085_g1	ABI3VP1
c125012_g2	SBP
c120102_g1	MED7
c100216_g1	TCP
c129156_g1	GRAS
c120243_g1	ARF
c126625_g1	SWI/SNF-BAF60b
c121098_g1	GRF
c133883_g1	Orphans
c86257_g1	HSF
c334709_g1	MYB
c103679_g1	PLATZ
c96264_g1	C3H
c133064_g1	MYB
c126933_g1	bHLH
c133136_g1	C2C2-Dof
c131967_g3	zf-HD
c127876_g1	MADS
c15576_g1	G2-like
c125607_g2	AUX/IAA
c126760_g1	Orphans
c131182_g1	C3H
c128577_g3	NAC
c209277_g1	CSD
c121147_g1	MYB
c132829_g1	ARID
c136305_g2	mTERF
c134597_g1	Orphans
c134690_g1	Orphans
c117991_g1	AP2-EREBP
c132676_g1	GeBP
c119897_g1	GeBP
c131525_g1	bHLH
c136362_g3	C2H2
c132657_g3	HB
c136620_g1	SBP
c134886_g1	C3H
c133962_g2	MYB
c120871_g1	AP2-EREBP
c121665_g1	WRKY
c136859_g2	mTERF
c46080_g1	C3H
c127536_g1	mTERF
c33867_g1	C2H2
c118055_g2	AP2-EREBP
c129160_g1	Trihelix
c135597_g8	bHLH
c115480_g1	C2H2
c116531_g1	HMG
c125805_g2	SAP
c134860_g3	Trihelix
c130472_g1	AP2-EREBP
c134568_g1	bHLH
c212211_g1	PHD
c116027_g1	G2-like
c111530_g1	bHLH
c126860_g1	C2C2-GATA
c122332_g1	BSD
c128681_g1	MBF1
c126670_g1	HB
c27422_g1	E2F-DP
c125807_g1	HSF
c108529_g1	ABI3VP1
c130069_g1	MYB
c127198_g1	FAR1
c109158_g1	MYB
c133998_g2	SBP
c289349_g1	MBF1
c134293_g4	WRKY
c125490_g1	TCP
c129231_g1	E2F-DP
c106377_g2	MADS
c127341_g1	PHD
c136694_g3	NAC
c126508_g2	MYB
c128468_g2	CCAAT
c124777_g1	Orphans
c124386_g1	Trihelix
c133428_g1	HSF
c103727_g2	CCAAT
c114966_g1	C2H2
c134293_g2	CCAAT
c128577_g1	NAC
c135164_g3	ABI3VP1
c209015_g1	PHD
c109485_g1	SET
c45184_g1	C2H2
c102269_g1	TCP
c133337_g3	SET
c112950_g1	AP2-EREBP
c83878_g1	bZIP
c126445_g2	CCAAT
c136322_g2	AP2-EREBP
c134650_g3	HB
c133642_g1	SNF2
c76137_g1	HB
c134950_g1	SET
c128800_g1	MADS
c136892_g1	TCP
c122114_g1	HSF
c136206_g6	BES1
c80729_g1	GNAT
c124341_g1	CCAAT
c83234_g1	LIM
c263927_g1	Coactivator p15
c116187_g1	MYB
c129555_g5	zf-HD
c121608_g1	zf-HD
c26105_g1	CPP
c122072_g1	NAC
c279860_g1	C3H
c117625_g1	ABI3VP1
c132223_g2	Sigma70-like
c125872_g3	NAC
c202137_g1	FHA
c118299_g1	MYB
c124932_g1	FAR1
c250993_g1	MADS
c292597_g1	CCAAT
c129840_g1	FAR1
c120698_g1	HB
c129135_g2	GRAS
c133364_g3	Trihelix
c322472_g1	C3H
c75064_g1	ABI3VP1
c58016_g1	FHA
c136023_g1	Jumonji
c125354_g1	C2H2
c99121_g1	CCAAT
c131447_g1	LUG
c121862_g1	TUB
c128215_g1	HRT
c123636_g1	BES1
c136503_g1	RWP-RK
c133574_g2	C2H2
c85696_g1	TUB
c14313_g1	Orphans
c133357_g2	FAR1
c84166_g1	MYB
c124529_g1	ABI3VP1
c126129_g2	FHA
c131738_g4	ARF
c244176_g1	MYB
c131911_g2	GRAS
c136877_g1	G2-like
c144346_g1	HSF
c110867_g1	C3H
c121485_g1	CSD
c125973_g1	C2H2
c123359_g1	HB
c326027_g1	C3H
c118694_g1	C2C2-YABBY
c258631_g1	C2H2
c128913_g1	MYB
c277916_g1	SNF2
c136575_g2	MADS
c130432_g6	NAC
c93907_g1	HB
c181174_g1	HB
c130203_g2	AP2-EREBP
c118211_g1	mTERF
c128077_g2	GRAS
c114355_g1	HMG
c114277_g1	HMG
c129961_g1	MADS
c124228_g1	MYB
c88263_g1	CCAAT
c117968_g1	Orphans
c129131_g1	WRKY
c116511_g1	MYB
c113079_g1	IWS1
c50175_g1	TRAF
c21947_g1	HB
c210217_g1	Orphans
c126776_g1	C3H
c102147_g1	LIM
c133303_g2	CSD
c129765_g1	CCAAT
c100803_g1	Orphans
c135632_g1	SNF2
c124072_g1	bZIP
c183192_g1	FHA
c123893_g1	AP2-EREBP
c128711_g2	AP2-EREBP
c134341_g1	GNAT
c318134_g1	GNAT
c124348_g1	G2-like
c126011_g2	bHLH
c132641_g1	CCAAT
c96361_g1	HB
c136165_g1	SNF2
c132479_g1	MYB
c134258_g2	C2C2-CO-like
c111805_g1	MYB
c104367_g1	LIM
c124927_g1	MYB
c133908_g1	NAC
c126902_g1	AP2-EREBP
c129208_g2	TCP
c127157_g2	bHLH
c111403_g1	Orphans
c132364_g1	ARF
c135795_g1	C3H
c107142_g1	Orphans
c109117_g1	NAC
c40525_g1	ABI3VP1
c74676_g1	AP2-EREBP
c109810_g1	OFP
c123881_g1	Tify
c246267_g1	C2H2
c59867_g1	SWI/SNF-SWI3
c135438_g1	mTERF
c289323_g1	ARID
c136046_g1	SNF2
c131695_g2	FAR1
c117647_g3	S1Fa-like
c16337_g1	Jumonji
c129945_g1	SWI/SNF-BAF60b
c127333_g1	C2H2
c129748_g2	SWI/SNF-BAF60b
c131781_g1	GRAS
c132433_g4	C3H
c9007_g1	G2-like
c136829_g1	LOB
c135832_g1	IWS1
c132293_g1	SET
c76173_g1	bZIP
c135923_g1	TAZ
c120264_g1	HB
c136465_g1	PHD
c210339_g1	MYB
c129643_g2	ABI3VP1
c128654_g1	FHA
c136082_g1	BES1
c330801_g1	C3H
c134292_g2	AP2-EREBP
c128614_g2	AP2-EREBP
c119711_g1	MYB
c132582_g1	HB
c133318_g1	PHD
c96236_g1	CSD
c332206_g1	SET
c130322_g3	GRAS
c124675_g1	C2C2-GATA
c115956_g1	LOB
c113526_g2	TIG
c146825_g1	AUX/IAA
c126397_g2	C2H2
c97464_g1	HMG
c130153_g2	mTERF
c134909_g3	Orphans
c133085_g1	MYB
c130499_g1	GeBP
c93433_g1	Orphans
c244122_g1	bHLH
c133680_g1	bHLH
c118377_g3	WRKY
c26760_g1	ABI3VP1
c128079_g2	Orphans
c134064_g1	CCAAT
c129585_g1	Orphans
c101660_g2	C2H2
c136910_g2	BSD
c132300_g1	TRAF
c94564_g2	ABI3VP1
c130159_g1	SWI/SNF-SWI3
c144597_g1	FHA
c122271_g1	LOB
c136279_g2	CSD
c41431_g1	TCP
c126842_g1	NAC
c128748_g1	NAC
c131446_g1	CCAAT
c121196_g1	AP2-EREBP
c134833_g1	SNF2
c124389_g1	C3H
c135232_g3	GRF
c136008_g2	WRKY
c316094_g1	MYB
c128633_g5	MYB
c86939_g1	CSD
c212598_g1	Jumonji
c99775_g1	AUX/IAA
c289451_g1	Orphans
c133187_g1	HB
c122167_g1	BBR/BPC
c89857_g1	Orphans
c131213_g2	C2H2
c126473_g6	MYB
c132283_g2	bZIP
c58621_g1	C2H2
c131874_g3	MADS
c118906_g1	PLATZ
c132862_g1	AP2-EREBP
c135303_g1	OFP
c115798_g1	zf-HD
c122682_g1	GRAS
c121680_g1	BSD
c115139_g1	bZIP
c136762_g3	bHLH
c128510_g1	C2C2-GATA
c250529_g1	MBF1
c130931_g1	MYB
c134416_g3	HMG
c132054_g1	SWI/SNF-BAF60b
c130159_g1	MYB
c132078_g1	C2H2
c122697_g1	NAC
c111328_g1	MADS
c136492_g1	mTERF
c115741_g1	LOB
c125617_g1	PLATZ
c86040_g1	MYB
c129958_g3	mTERF
c127713_g1	LOB
c136877_g1	ARR-B
c134807_g1	WRKY
c130396_g1	bHLH
c120924_g2	MYB
c123821_g2	bZIP
c136482_g2	WRKY
c130205_g1	CCAAT
c124140_g1	bHLH
c19263_g1	CSD
c120881_g1	TRAF
c128193_g1	C3H
c127591_g1	Orphans
c130540_g2	HB
c127377_g1	ABI3VP1
c121124_g1	CCAAT
c135936_g3	MYB
c282581_g1	FHA
c126365_g1	MYB
c130381_g1	Trihelix
c109581_g1	LIM
c134509_g4	MYB
c135900_g1	PHD
c136848_g6	GRAS
c129187_g4	zf-HD
c117673_g2	bZIP
c128433_g1	AP2-EREBP
c110790_g1	SNF2
c131359_g1	HB
c131247_g1	mTERF
c135171_g3	FAR1
c127788_g1	C3H
c81587_g1	C2H2
c111654_g2	AUX/IAA
c120501_g1	WRKY
c99957_g1	CCAAT
c94564_g1	ABI3VP1
c134847_g3	C2C2-Dof
c120236_g1	WRKY
c129189_g1	C3H
c129114_g3	MYB
c130118_g1	WRKY
c128703_g3	C2C2-Dof
c126399_g1	C2H2
c78120_g1	C3H
c210603_g1	MYB
c105103_g1	C2H2
c136636_g1	NAC
c127646_g1	FHA
c115477_g1	Coactivator p15
c136908_g2	mTERF
c127835_g2	C3H
c130438_g1	NAC
c133811_g2	HB
c136577_g2	G2-like
c126792_g2	LOB
c119067_g1	C2H2
c132053_g3	Trihelix
c124863_g1	bHLH
c146649_g1	bHLH
c115812_g1	MYB
c129958_g6	mTERF
c212538_g1	PHD
c118213_g1	TIG
c136894_g1	NAC
c123476_g1	HSF
c126473_g2	MYB
c134077_g2	bZIP
c117059_g1	SRS
c122235_g1	WRKY
c130127_g5	ABI3VP1
c123880_g1	TRAF
c112885_g1	MYB
c127377_g4	ABI3VP1
c129600_g3	WRKY
c114604_g2	HB
c116341_g1	AP2-EREBP
c132198_g2	C2H2
c114473_g1	AUX/IAA
c132829_g2	ARID
c130540_g3	HB
[truncated: 304 more rows]
